# Supplementary material
Source: Elsevier journal article supplement (https://www.sciencedirect.com/science/article/pii/S0300893216304997)

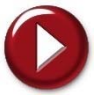

**Material suplementario**

---

**Resultados del implante de armazón bioabsorbible de everolimus en segmentos largos  
atendiendo al concepto de solapamiento de armazones**

---

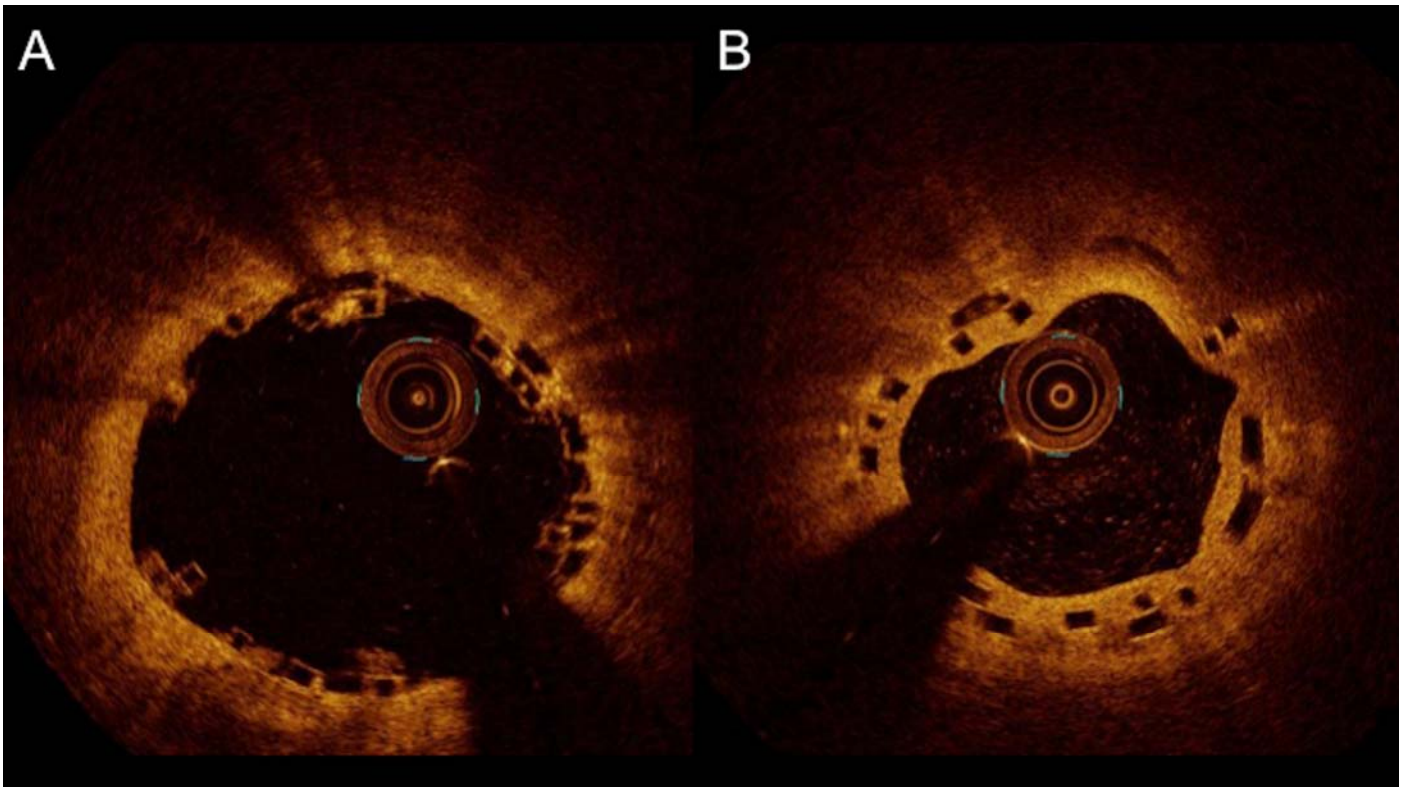

Supplement: mmc1 [file S0300893216304997:mmc1.pdf]
